# Supplementary material
Source: HighWire-hosted journal article supplement (https://www.cmajopen.ca/highwire/filestream/80715/field_highwire_adjunct_files/0/open-2013-0001-1-at.pdf)
Supplement: open-2013-0001-1-at.pdf [file open-2013-0001-1-at.pdf]

**APPENDIX 1 (as supplied by authors): Univariable analysis results showing distribution of patient and hospital characteristics between exposure groups**

On univariable analysis, patients who were younger, female, with a lower comorbidity burden and without common bile duct obstruction were more likely to undergo early operative intervention (Table S1). As well, patients admitted to non-teaching hospitals, hospitals that had high OR utilization after hours and, hospitals that had a high institutional volume of acute cholecystitis admissions and elective cholecystectomies, were more likely to undergo early cholecystectomy (Table S2).

**Table S1.** Distribution of patient characteristics

|                                     | Early<br>cholecystectomy<br><br>N=14,286 | No early<br>cholecystectomy<br><br>N=10,151 | P value          |
|-------------------------------------|------------------------------------------|---------------------------------------------|------------------|
| <b>Age (years)</b>                  |                                          |                                             | <b>&lt;0.001</b> |
| 18 – 35                             | 2791 (20)                                | 1200 (12)                                   |                  |
| 36 – 50                             | 3859 (27)                                | 1863 (18)                                   |                  |
| 51 – 65                             | 3857 (27)                                | 2447 (24)                                   |                  |
| 66 – 80                             | 2990 (21)                                | 2975 (29)                                   |                  |
| >80                                 | 809 (6)                                  | 1666 (17)                                   |                  |
| <b>Female sex</b>                   | 8,810 (62)                               | 5,553 (55)                                  | <b>&lt;0.001</b> |
| <b>Income quintile</b>              |                                          |                                             | <b>0.02</b>      |
| 1 (lowest)                          | 3,165 (22)                               | 2,119 (22)                                  |                  |
| 2                                   | 3,017 (21)                               | 2,234 (22)                                  |                  |
| 3                                   | 2,754 (19)                               | 2,086 (21)                                  |                  |
| 4                                   | 2,802 (20)                               | 1,887 (19)                                  |                  |
| 5                                   | 2,548 (18)                               | 1,745 (17)                                  |                  |
| <b>Comorbidity index quartile</b>   |                                          |                                             | <b>&lt;0.001</b> |
| 1(lowest)                           | 4,132 (29)                               | 2,134 (21)                                  |                  |
| 2                                   | 3,799 (27)                               | 2,370 (24)                                  |                  |
| 3                                   | 3,339 (23)                               | 2,330 (23)                                  |                  |
| 4                                   | 3,016 (21)                               | 3,317 (32)                                  |                  |
| <b>Common bile duct obstruction</b> | 1,119 (8)                                | 1,539 (16)                                  | <b>&lt;0.001</b> |
| <b>Pancreatitis</b>                 | 659 (5)                                  | 464 (5)                                     | 0.88             |

All values are presented as N(%)

**Table S2.** Distribution of hospital characteristics

|                                                                       | <b>Early<br/>cholecystectomy</b> | <b>No early<br/>cholecystectomy</b> | <b>P value</b>   |
|-----------------------------------------------------------------------|----------------------------------|-------------------------------------|------------------|
|                                                                       | <b>N=14,286</b>                  | <b>N=10,151</b>                     |                  |
| <b>Teaching status</b>                                                |                                  |                                     | <b>&lt;0.001</b> |
| Academic teaching                                                     | 2,467 (17)                       | 2720 (27)                           |                  |
| Non-teaching                                                          | 11,819 (83)                      | 7,431 (73)                          |                  |
| <b>After-hours operating room<br/>utilization† (quartile)</b>         |                                  |                                     | <b>&lt;0.001</b> |
| 1(lowest)                                                             | 1,036 (7)                        | 1,238 (12)                          |                  |
| 2                                                                     | 2,712 (18)                       | 2,156 (21)                          |                  |
| 3                                                                     | 4,505 (31)                       | 3,154 (31)                          |                  |
| 4                                                                     | 6,033 (44)                       | 3,603 (36)                          |                  |
| <b>Annual volume of acute<br/>cholecystitis admissions (quartile)</b> |                                  |                                     | <b>&lt;0.001</b> |
| 5-17                                                                  | 502 (3)                          | 2,119 (9)                           |                  |
| 18-39                                                                 | 1,935 (14)                       | 2,234 (17)                          |                  |
| 40-65                                                                 | 3,799 (27)                       | 2,086 (33)                          |                  |
| 66-164                                                                | 8,050 (56)                       | 1,887 (41)                          |                  |
| <b>Annual volume of elective<br/>cholecystectomies (quartile)</b>     |                                  |                                     | <b>&lt;0.001</b> |
| 0-74                                                                  | 938 (7)                          | 1,364 (13)                          |                  |
| 75-159                                                                | 2,515 (18)                       | 1,700 (17)                          |                  |
| 160-279                                                               | 4,481 (31)                       | 2,712 (27)                          |                  |
| 280-905                                                               | 6,352 (44)                       | 4,375 (43)                          |                  |

All values are presented as N(%)† Ratio of total after-hours operative cases (for all surgical specialties) divided by the number of all-cause emergency department visits
